# Supplementary material for: Corrigendum to “High-Dose Polymerized Hemoglobin Fails to Alleviate Cardiac Ischemia/Reperfusion Injury due to Induction of Oxidative Damage in Coronary Artery”
Source: Hindawi journal article supplement (doi:10.1155/2019/4576867), 2019-03-04
Supplement: f1 [file 4576867.f1.pdf]

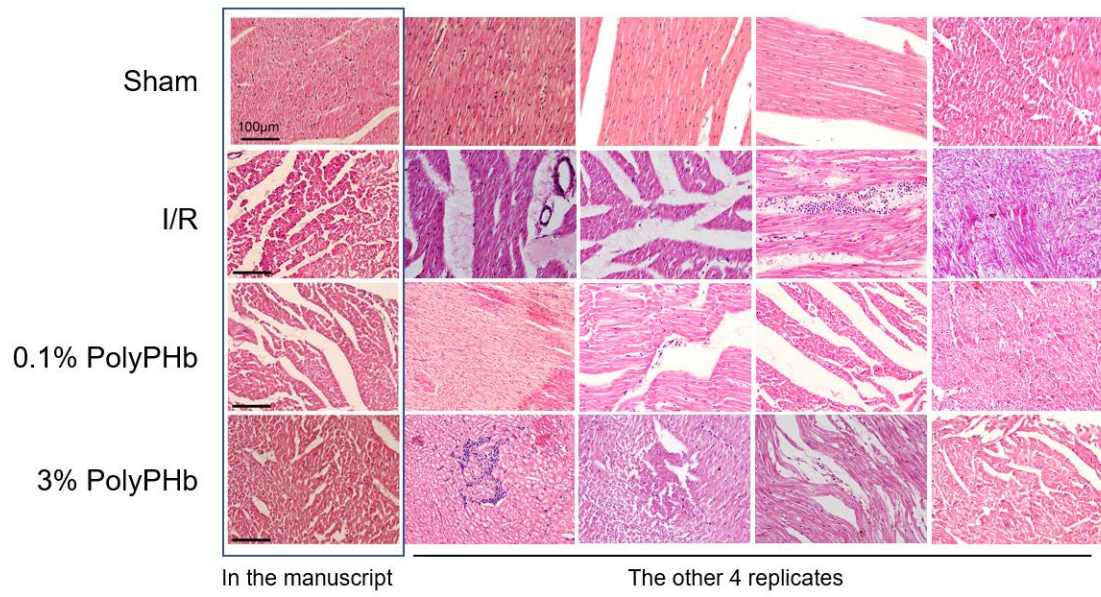

**Figure 4d.** The photomicrographs of H&E-stained left ventricular tissue sections from the 4 groups (n = 5). The pictures in the first column were selected as the representative for each group. Scale bar: 100 µm.
